# Supplementary material for: Growth of gold nanostructures on a Si wafer by concerted mechanisms of photoreduction and galvanic displacement
Source: Royal Society of Chemistry journal article supplement (doi:10.1039/c6ce01199c), 2016-01-01
Supplement: c6ce01199c1.pdf [file c6ce01199c1.pdf]

## **Supplementary Information**

### **Growth of Gold Nanostructures on Si Wafer by Concerted Mechanisms of Photoreduction and Galvanic Displacement**

**Tetsuro Soejima,\* Yukihiro Katayama, and Sohei Fujii**

Department of Applied Chemistry, Faculty of Science and Engineering, Kindai University, 3-4-1  
Kowakae, Higashi-osaka, Osaka 577-8502, Japan.

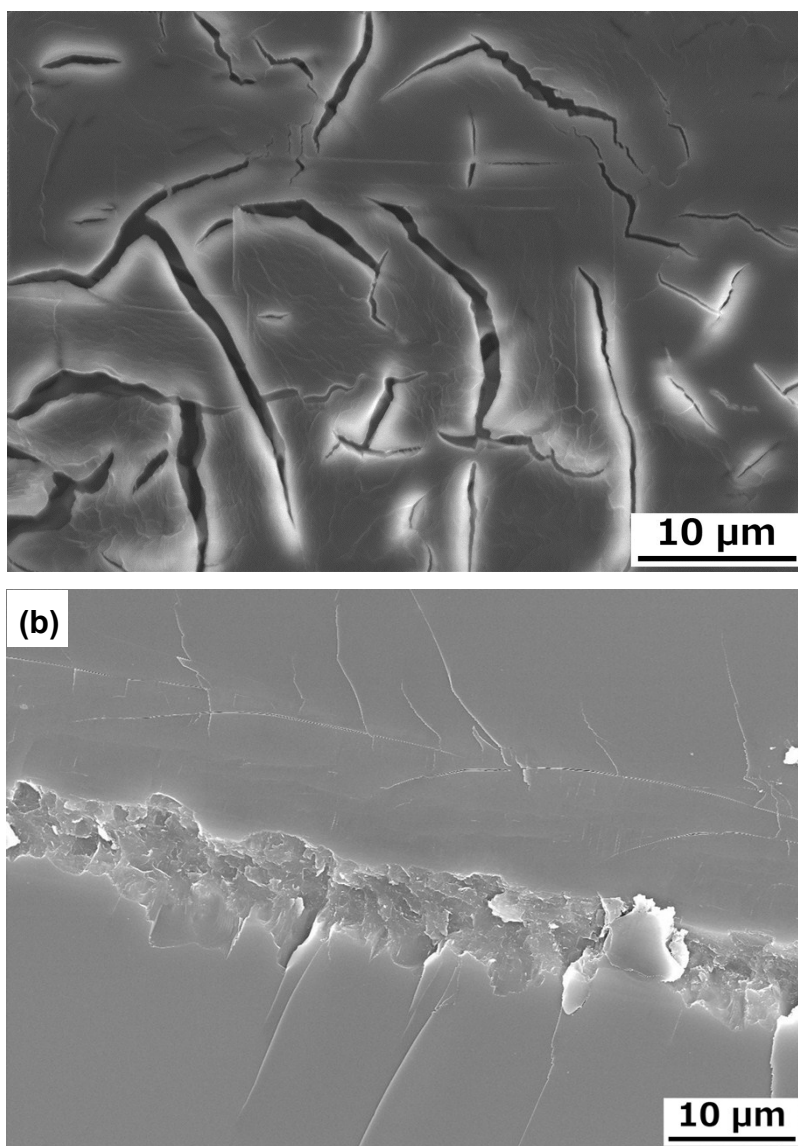

**Fig. S1** SEM images of CTAB covered Si wafer (a) and a Si wafer which is manually scratched using a pen-type diamond glass cutter (b).

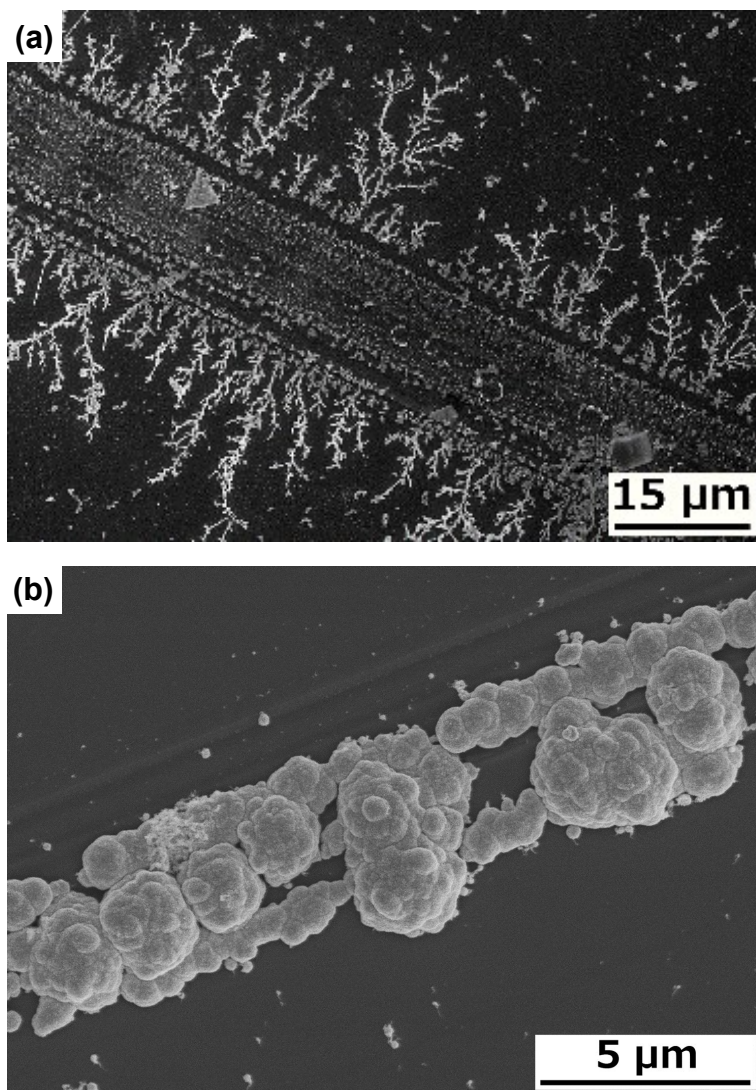

**Fig. S2** SEM images of gold nanostructures formed after photoirradiation of scratched Si wafers in  $\text{Au}(\text{OH})_4^-$  aqueous solution with (a) and without (b) CTAB film.

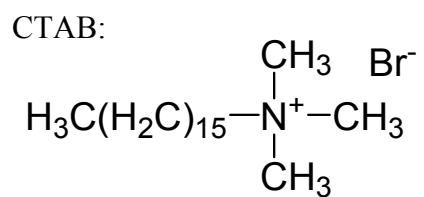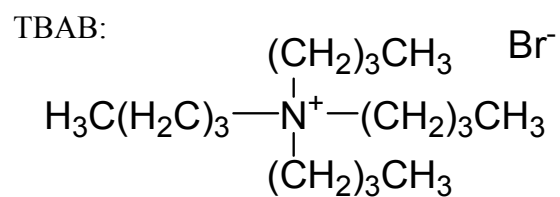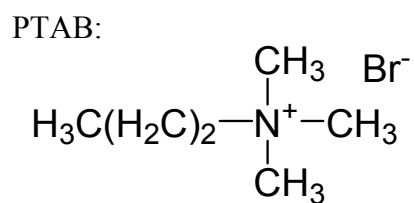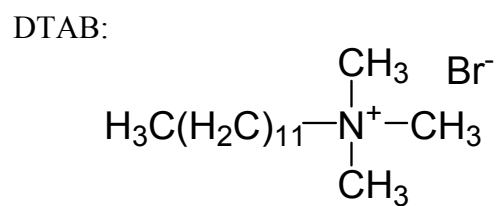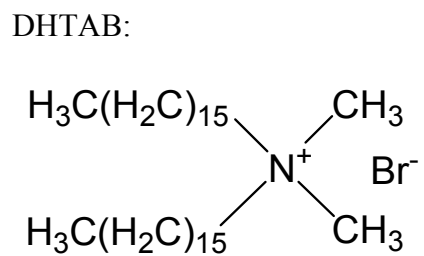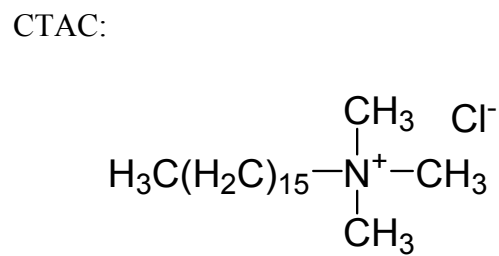

**Fig. S3** Chemical structures of organic salts which were used in the manuscript.

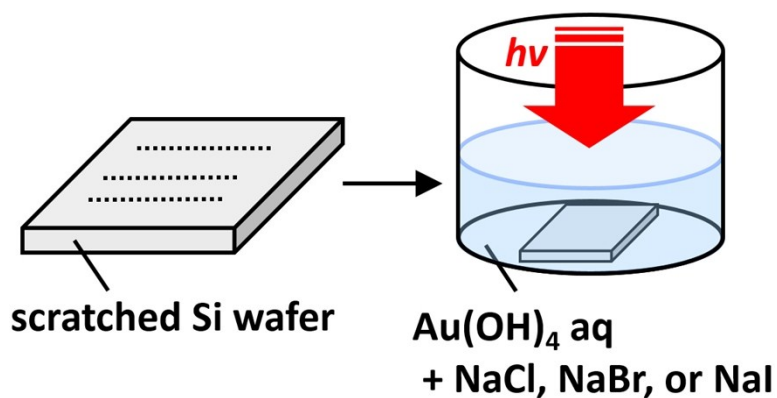

**Fig. S4** A schematic illustration of the experimental procedure. NaCl, NaBr, or NaI was dissolved in  $\text{Au(OH)}_4^-$  aqueous solution (molar ratio; halogen anion: $\text{Au}^{3+}$  ion = 4:1). Si wafers which were scratched by a pen type diamond glass cutter were placed in the  $\text{Au(OH)}_4^-$  aqueous solution containing sodium halide. The immersed wafers were photoirradiated perpendicularly in the  $\text{Au(OH)}_4^-$  aqueous solution.

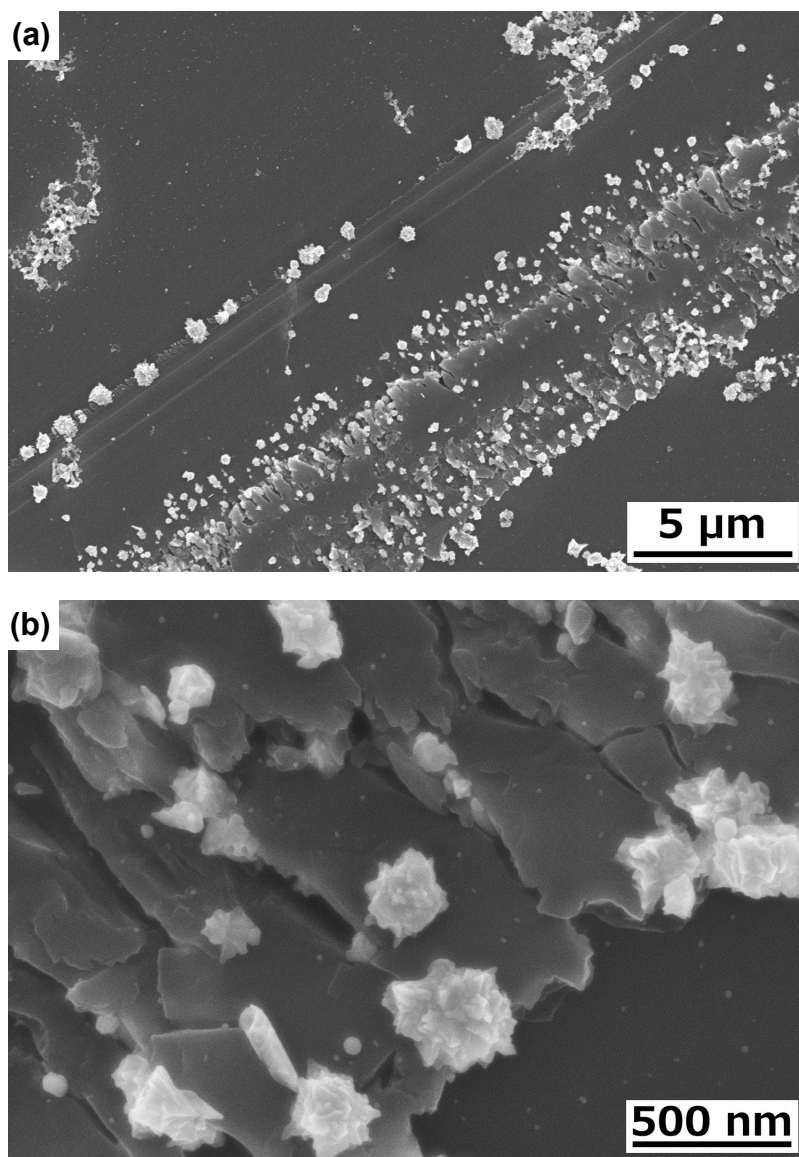

**Fig. S5** Low (a) and high (b) magnification SEM images of CTAB/scratched Si wafer after immersion in  $\text{Au}(\text{OH})_4^-$  aqueous solution without photoirradiation for 24 h. Gold nanocrystals preferentially deposited at the scratched portions.

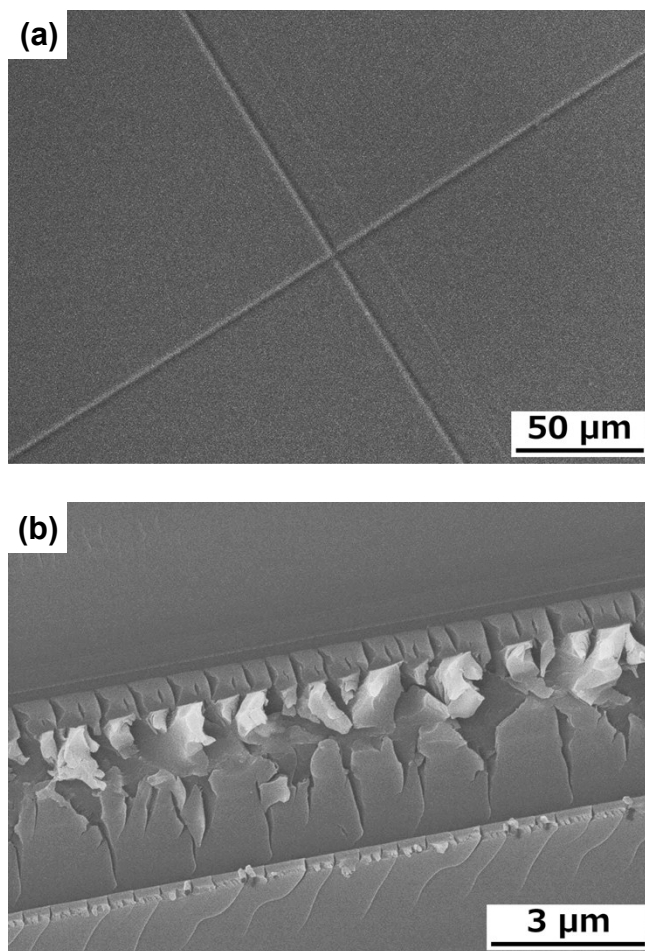

**Fig. S6** Low (a) and high (b) magnification SEM images of scratched glass film after photoirradiation in  $\text{Au}(\text{OH})_4^-$  aqueous solution for 30 min. The glass film was pre-covered with CTAB.

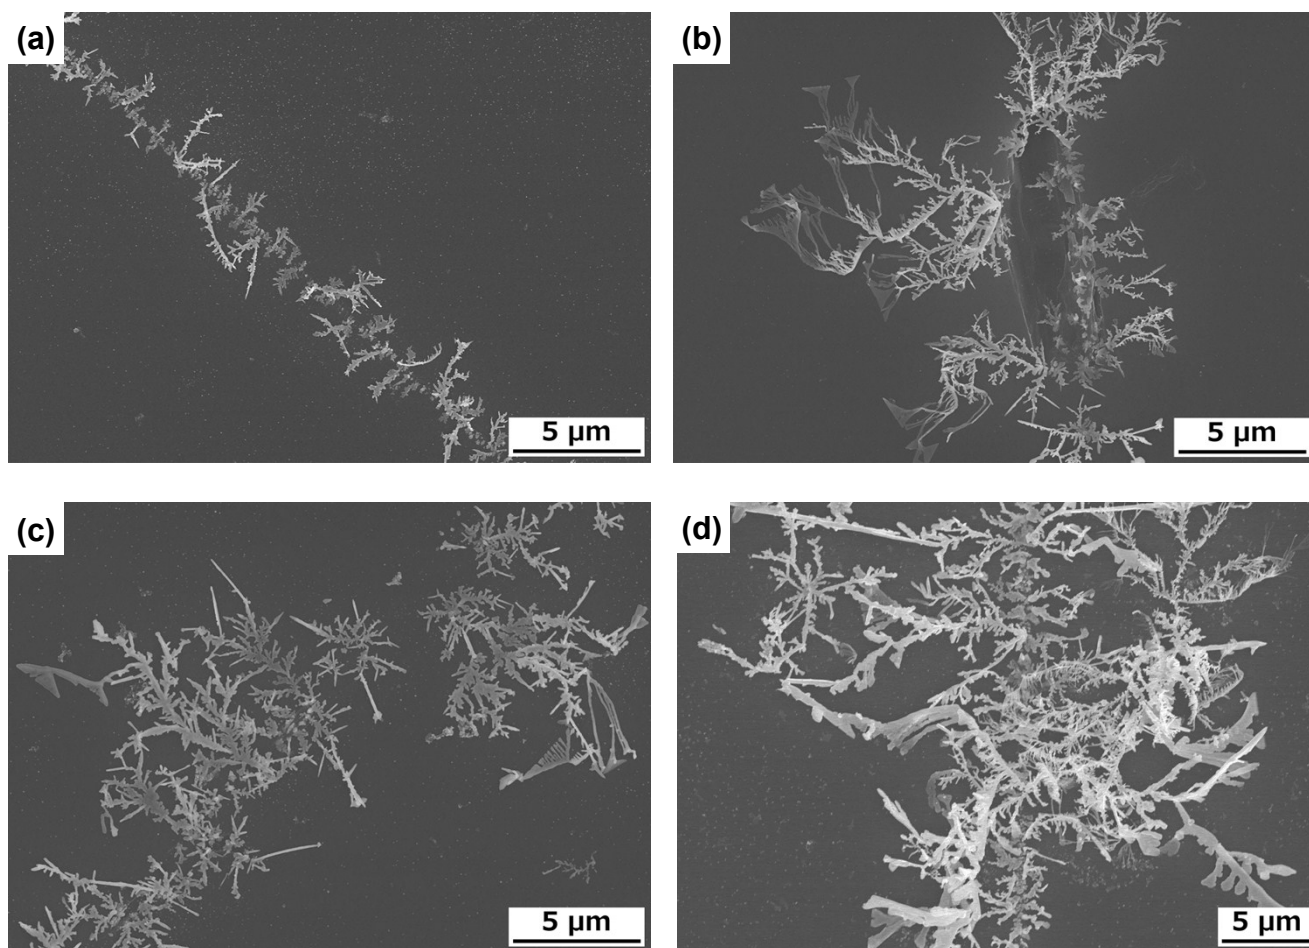

**Fig. S7** SEM images of dendritic gold nanostructures obtained at different photoirradiation periods: (a) 5 min, (b) 10 min, (c) 20 min, (d) 30 min.



**Table S1.** Concentration of Si ions in alkaline aqueous solution. Si wafer.

| Condition                                           | Si conc. (ppm) |
|-----------------------------------------------------|----------------|
| NaOH aqueous solution (pH 10)                       | 2.01           |
| $\text{Au}(\text{OH})_4^-$ aqueous solution (pH 10) | 4.79           |
